# Supplementary material for: Drug Metabolism of Hepatocyte-like Organoids and Their Applicability in In Vitro Toxicity Testing
Source: MDPI journal article supplement (doi:10.3390/molecules28020621), 2023-01-07
Supplement: s1 [file s1]

## Supplemental data

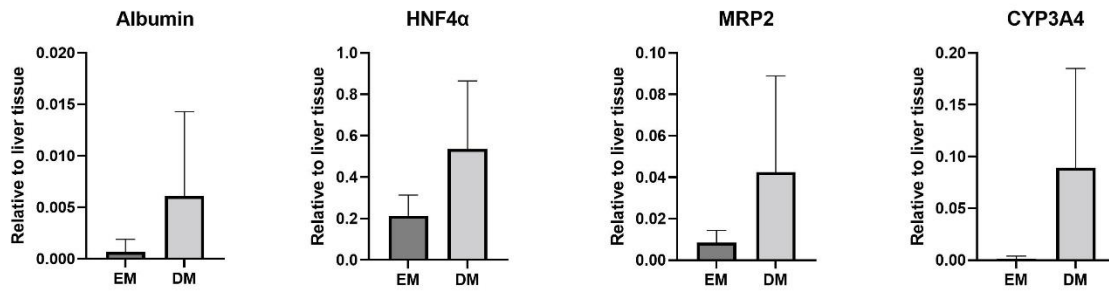

**Figure S1.** Gene expression of hepatic markers upon hepatic differentiation of ICOs. Gene expression levels are shown relative to levels in human liver tissue. EM: ICOs in expansion condition. DM: ICOs differentiated towards HL-ICOs. HNF4α, Hepatocyte Nucleus Factor 4 alpha; MRP2, Multi Resistance Protein 2; CYP3A4, Cytochrome P450 3A4. Expression is shown for multiple donors (n=6). Error bars represent the standard deviation.

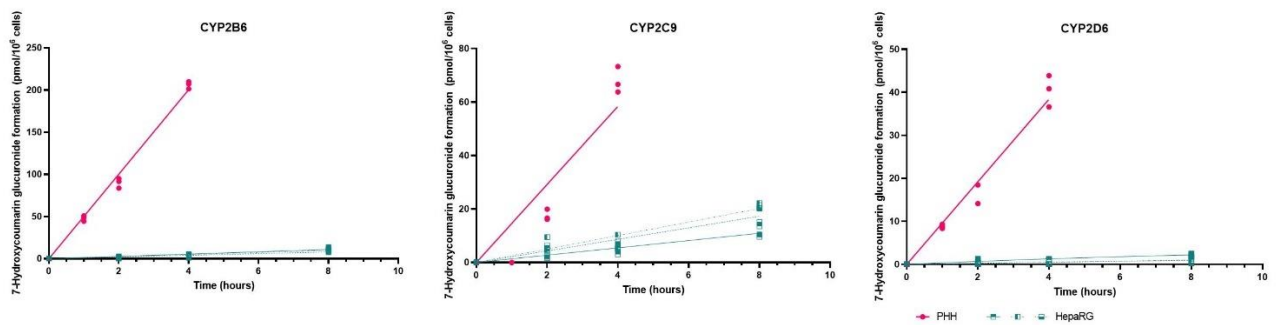

**Figure S2.** Metabolite formation of bupropion (CYP2B6), tolbutamide (CYP2C9), and dextrometorphan (CYP2D6) in primary human hepatocytes and HepaRGs. HepaRG: Each green symbol represents an independent experiment. PHH: Technical triplicates are shown in pink.
